# Supplementary material for: Graphene-nanoplatelets-supported NiFe-MOF: high-efficiency and ultra-stable oxygen electrodes for sustained alkaline anion exchange membrane water electrolysis
Source: Royal Society of Chemistry journal article supplement (doi:10.1039/d0ee00877j), 2020-01-01
Supplement: d0ee00877j1.pdf [file d0ee00877j1.pdf]

## **Supporting Information**

**for**

### **Graphene-Nanoplatelets Supported NiFe-MOF: High-Efficient and Ultra-Stable Oxygen Electrodes for Sustained Alkaline Anion Exchange Membrane Water Electrolysis**

Pandiarajan Thangavel<sup>1</sup>, Miran Ha<sup>1,2</sup>, Shanmugasundaram Kumaraguru<sup>3</sup>, Abhishek Meena<sup>1</sup>,  
Aditya Narayan Singh<sup>1</sup>, Ahmad M. Harzandi<sup>1</sup> and Kwang S. Kim<sup>1\*</sup>

<sup>1</sup>Center for Superfunctional Materials, Department of Chemistry, Ulsan National Institute of Science and Technology (UNIST), 50 UNIST-gil, Ulsan 44919, Korea.

<sup>2</sup>Department of Energy and Chemical Engineering, Ulsan National Institute of Science and Technology (UNIST), 50 UNIST-gil, Ulsan 44919, Korea.

<sup>3</sup>CSIR-Central Electrochemical Research Institute, Karaikudi-630003, Tamilnadu, India.

\*E-mail: [kimks@unist.ac.kr](mailto:kimks@unist.ac.kr)

### Supplementary Note:

Fourier transform infrared (FTIR) spectra were obtained to analyze the surface functional groups (**Fig. 2c**). The absorption peaks at 1370 and 1427  $\text{cm}^{-1}$  corresponding to the asymmetric vibrations, while the peak at 1514  $\text{cm}^{-1}$  represents the symmetric vibrations of carboxylic group in the MOFs.<sup>1</sup> Similarly, a broad peak centered at 3450  $\text{cm}^{-1}$  indicating the stretching mode of OH group originates from the surface-absorbed water molecules in MOFs.<sup>2</sup> In addition, the peaks observed at 724 and 1313  $\text{cm}^{-1}$  are assigned to the -C-H- and C-C stretching vibrations of the benzene ring in the organic linker.<sup>3</sup> Peaks at 540 and 1643  $\text{cm}^{-1}$  are attributed to bond between metal ions and COO- groups of BTC, which reveals the successful coordination of Ni/Fe with the BTC linker.<sup>4-6</sup>

The surface characteristics of NiFe-BTC-GNPs are also evaluated using Raman spectroscopy (**Fig. 2d**). All MOF samples exhibit characteristic Raman active mode at 1000 and 3085  $\text{cm}^{-1}$  corresponding to  $\nu(\text{CH})$  stretching of the organic linker<sup>7</sup>. Similarly, the bands at 1610 and 1006  $\text{cm}^{-1}$  are related to  $\nu(\text{C}=\text{C})$  modes of the benzene ring; the peaks at 824 and 724  $\text{cm}^{-1}$  are attributed to out-of-plane ring (C-H) bending vibrations and out-of-plane ring bending, respectively. Further, the doublet located at 1550 and 1460  $\text{cm}^{-1}$  indicate the presence of  $\text{asym}(\text{C}-\text{O}_2)$  and  $\text{asym}(\text{C}-\text{O}_2)$  groups.<sup>8</sup> In the case of NiFe-BTC-GNPs and NiFe-BTC MOFs, three additional bands at 480, 565 and 719  $\text{cm}^{-1}$  are assigned to the characteristic bands of M-O-M and M-O ( $\text{M}=\text{Ni}^{2+}/\text{Fe}^{3+}$ ) in the corresponding MOF.<sup>9, 10</sup> These results are consistent with FTIR-spectral data in **Fig. 2c**. Particularly, the absence of the COOH peak around 1760–1690  $\text{cm}^{-1}$  would be a direct evidence of metal coordination with BTC.<sup>4-6</sup> Furthermore, the Raman spectra of NiFe-BTC-GNPs displays the major Raman features of graphene at 1350, 1582 and 2708  $\text{cm}^{-1}$  corresponding to D, G and 2D bands, respectively. The appearance of low-intensity D band indicates the high quality of the graphene in NiFe-BTC-GNPs. Besides, the sharp narrow 2D band

along with an  $I_{2D}/I_G$  value of 5.0 implies the presence of few-layer graphene in the composite material.<sup>11, 12</sup>

## Supplementary Figures

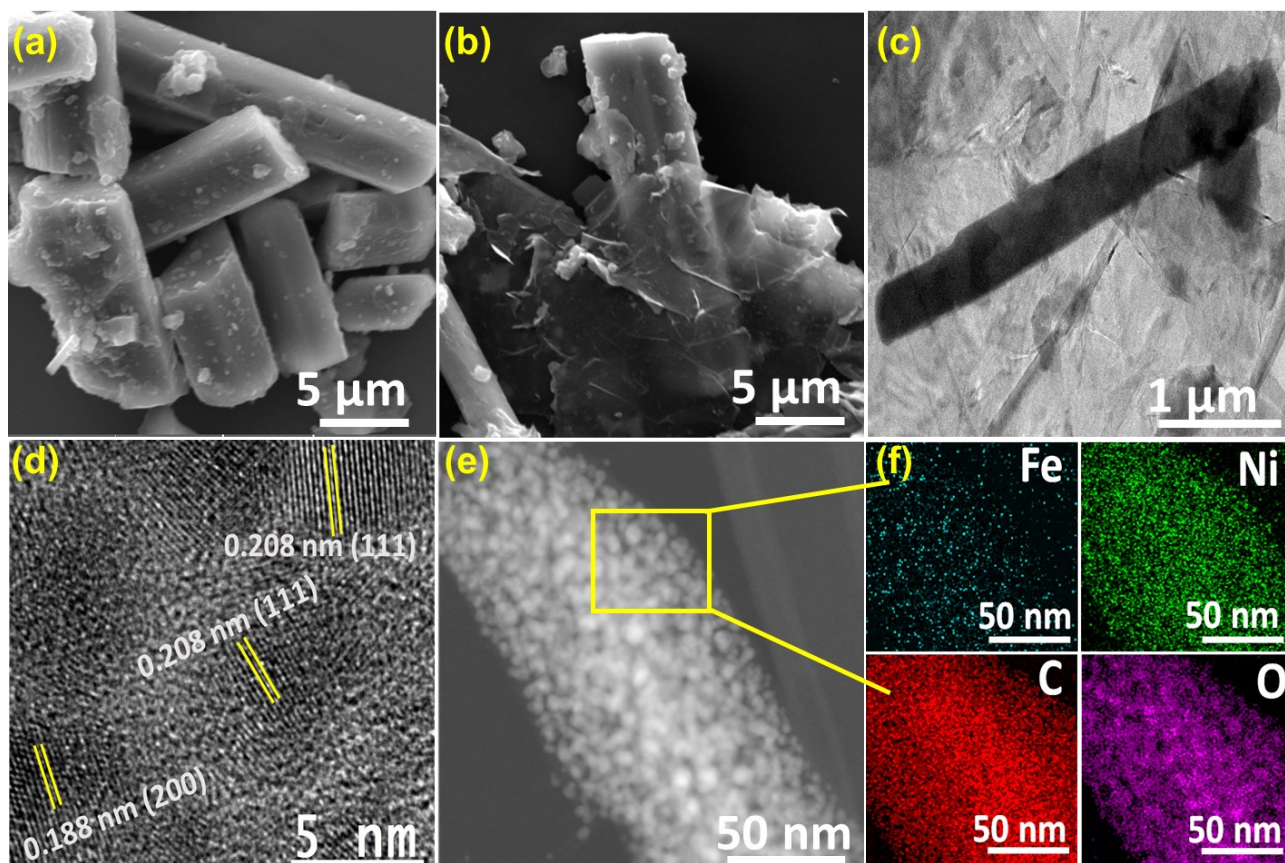

**Fig. S1** SEM and HRTEM images of NiFe-BTC and NiFe-BTC-GNPs MOFs. **a**, SEM images of NiFe-BTC. **b-d**, SEM (**b,c**) and HRTEM (**d**) images of NiFe-BTC-GNPs. **f**, HRTEM-EDS mapping of NiFe-BTC-GNPs.

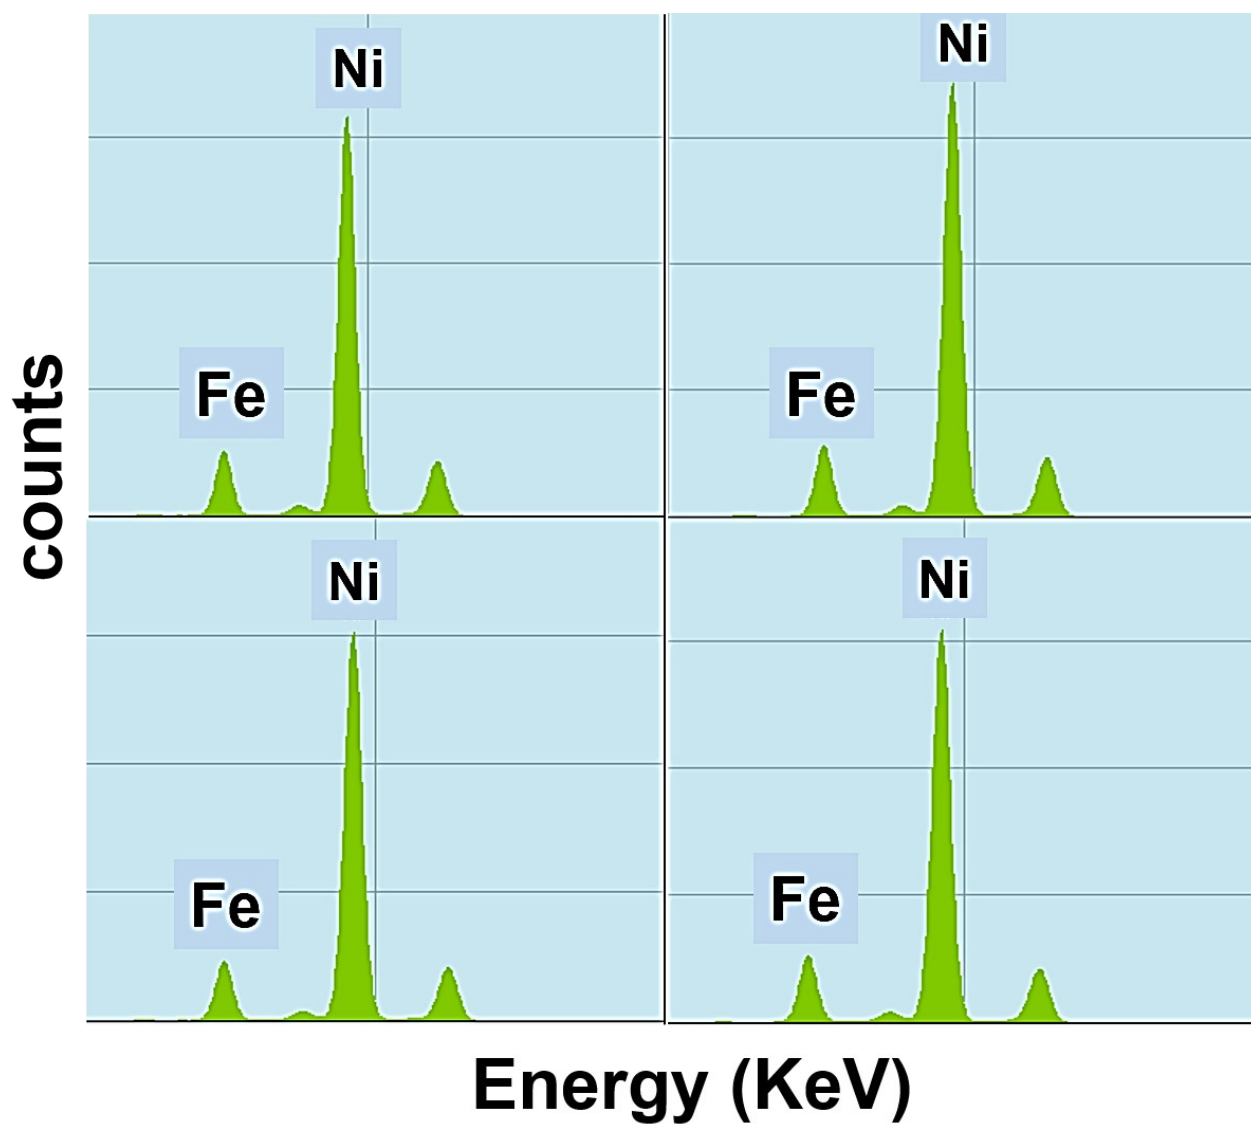

**Fig. S2** Elemental analysis Of NiFe-BTC-GNPs MOF. EDAX-XRF Analysis of NiFe-BTC-GNPs at different locations.

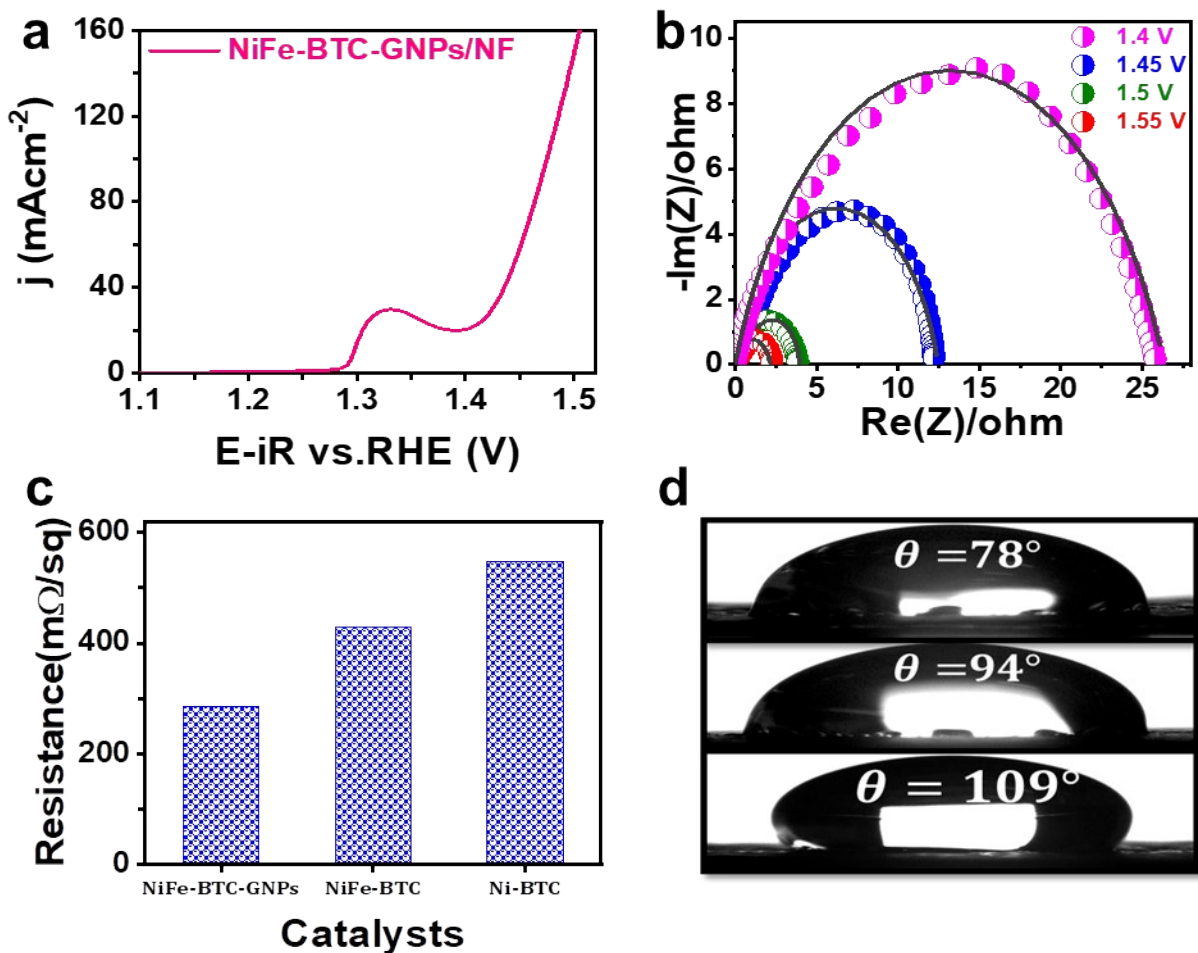

**Fig. S3** Electrochemical and Physical characterization of the MOF samples. **a**, Polarization curves of the NiFe-BTC-GNPs MOF loaded on Nickel Foam (NF) in 1M KOH Solution. **b**, Nyquist plots of NiFe-BTC-GNPs electrode measured as a function of applied potential in 1M KOH solution. **c**, Four Point Probe analysis of MOF samples. **d**, Contact angle measurements of the MOF samples (from bottom to top: Ni-BTC, NiFe-BTC, and NiFe-BTC-GNPs MOF).

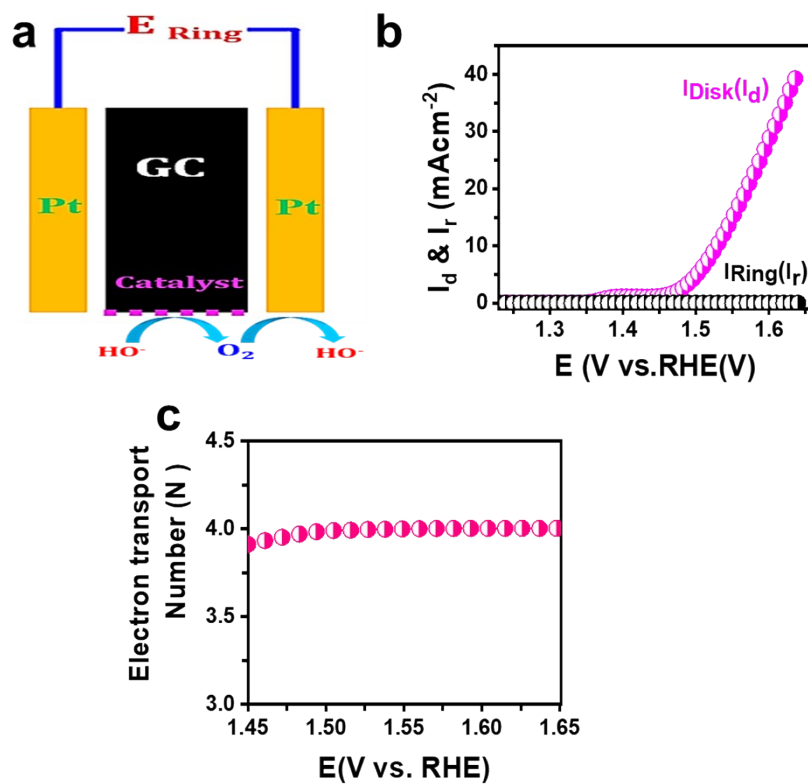

**Fig. S4** Faradaic efficiency calculation measured through ORR-OER method **a**, RRDE Setup. **b**, Rotating ring disk electrode (RRDE) voltammogram of NiFe-BTC-GNPs. **c**, Electron-transfer number ( $n$ ) as a function of applied potential calculated from fig.b.

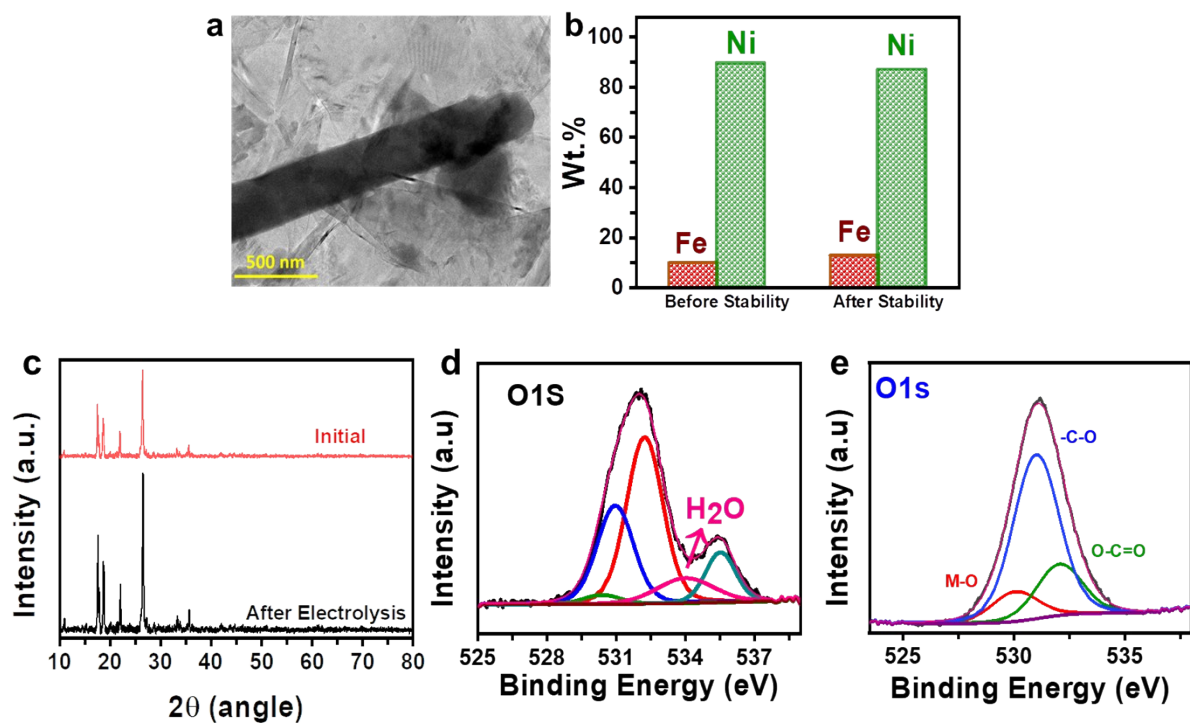

**Fig. S5** Elemental and crystal Phase analysis of NiFe-BTC-GNPs MOF after long-term stability studies. **a**, HRTEM image of NiFeBTC-GNPs after continuous electrolysis. **b**, ICP-MS analysis as – prepared sample and after stability. **c**, XRD Pattern of NiFe-BTC-GNPs. **d,e**, High-resolution O1s spectra of NiFe-BTC-GNPs MOF (d) after and (e) before continuous electrolysis.



## Theoretical overpotential of OER | DFT+U+TS

### NiFe-BTC

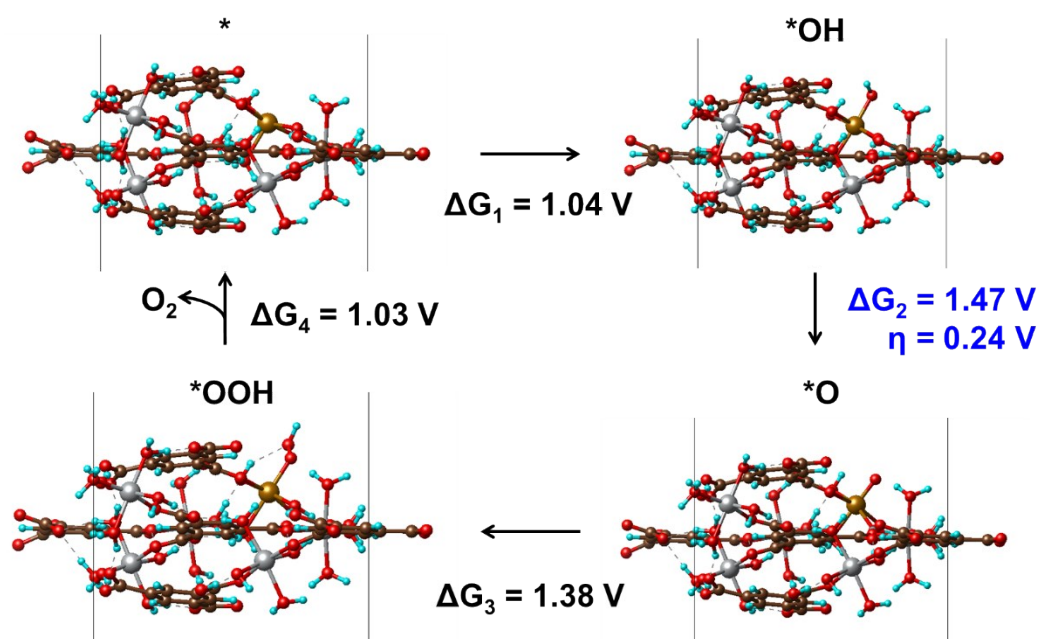

**Fig. S6** DFT-predicted structures of each intermediates on the active sites, their free energy differences and overpotentials. Fe site of NiFe-BTC (Fe: yellow, Ni: grey, C: brown, O: red, and H: cyan, respectively).

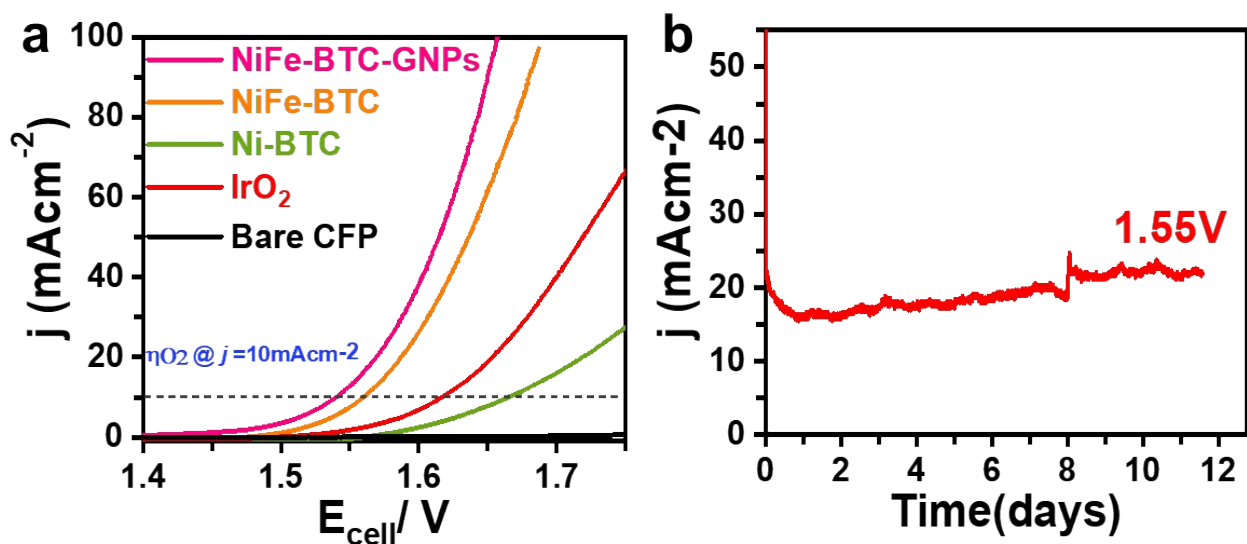

**Fig. S7** OER activity of MOF in Conventional Electrolyser: OER Performance of MOF measured in the conventional electrolyser using 20 wt% Pt/C as a cathode. **a**, Polarization plots of the electrolyser obtained in 1M aqueous KOH solution at RT with scan rate of  $1 \text{ mV S}^{-1}$ . **b**, Long-term stability of the electrolyser with NiFe-BTC-GNPs anode measured by applying a constant potential of 1.55 V for 12 days. The conventional electrolyser (fine frit-separator) was fabricated by utilizing the as-synthesized BTC-derived catalysts on CFP as anode electrodes and the commercial 20% Pt/C on CFP as cathode electrodes. For comparison, the state-of-the-art  $\text{IrO}_2$  and  $\text{Co}_3\text{O}_4$  based anodes were also fabricated. NiFe-BTC-GNPs based electrolyzer exhibits excellent performance compared to other anode catalysts, requiring smaller  $\eta = 250/330 \text{ mV}$  to reach  $j = 10/100 \text{ mA cm}^{-2}$  (a). These values are even better than the state-of-the-art  $\text{IrO}_2/(\text{Pt/C})$  electrodes which demands larger  $\eta$  to achieve similar current densities. The NiFe-BTC-GNPs based electrolyser demonstrates excellent long-term stability for 12 days on continuous electrolysis operation (b).

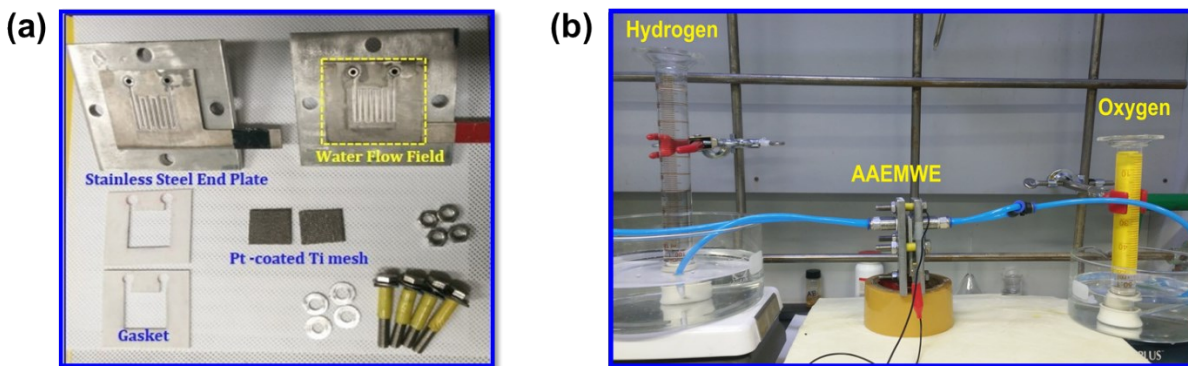

**Fig. S8** Components of Prototype AAEMWE . (a) AAEMWE setup used in this study. (b) Demonstration of AAEMWE for practical hydrogen generation.

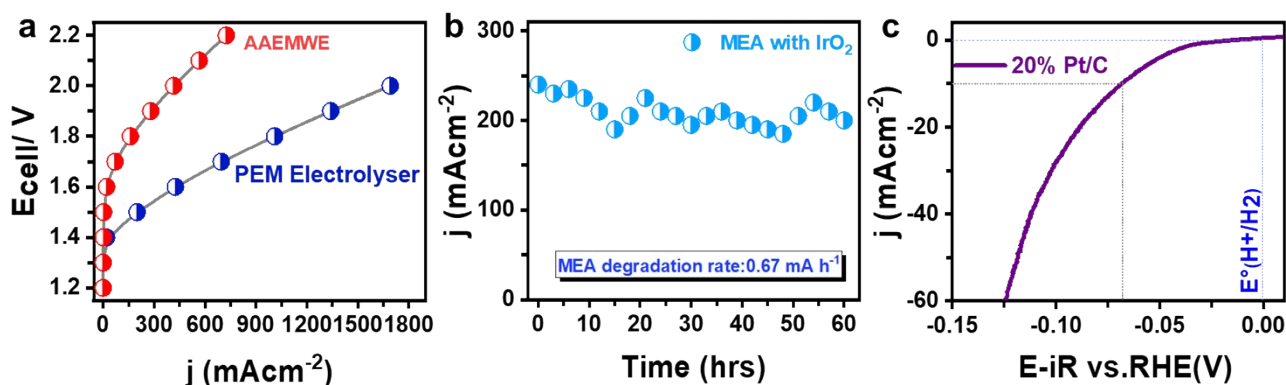

**Fig. S9** Electrochemical characterization of Commercial AAEMWE **a**, LSV curves of AAEMWE and PEM electrolyser with Commercial 20% Pt/C cathode and  $\text{IrO}_2$  anode in ultrapure water electrolyte at 70°C. **b**, Stability of MEA with commercial catalysts (20 % Pt/C cathode and  $\text{IrO}_2$  anode) at 25°C. **c**, Polarization curve obtained with commercial Pt/C loaded on CFP in 1M KOH solution.

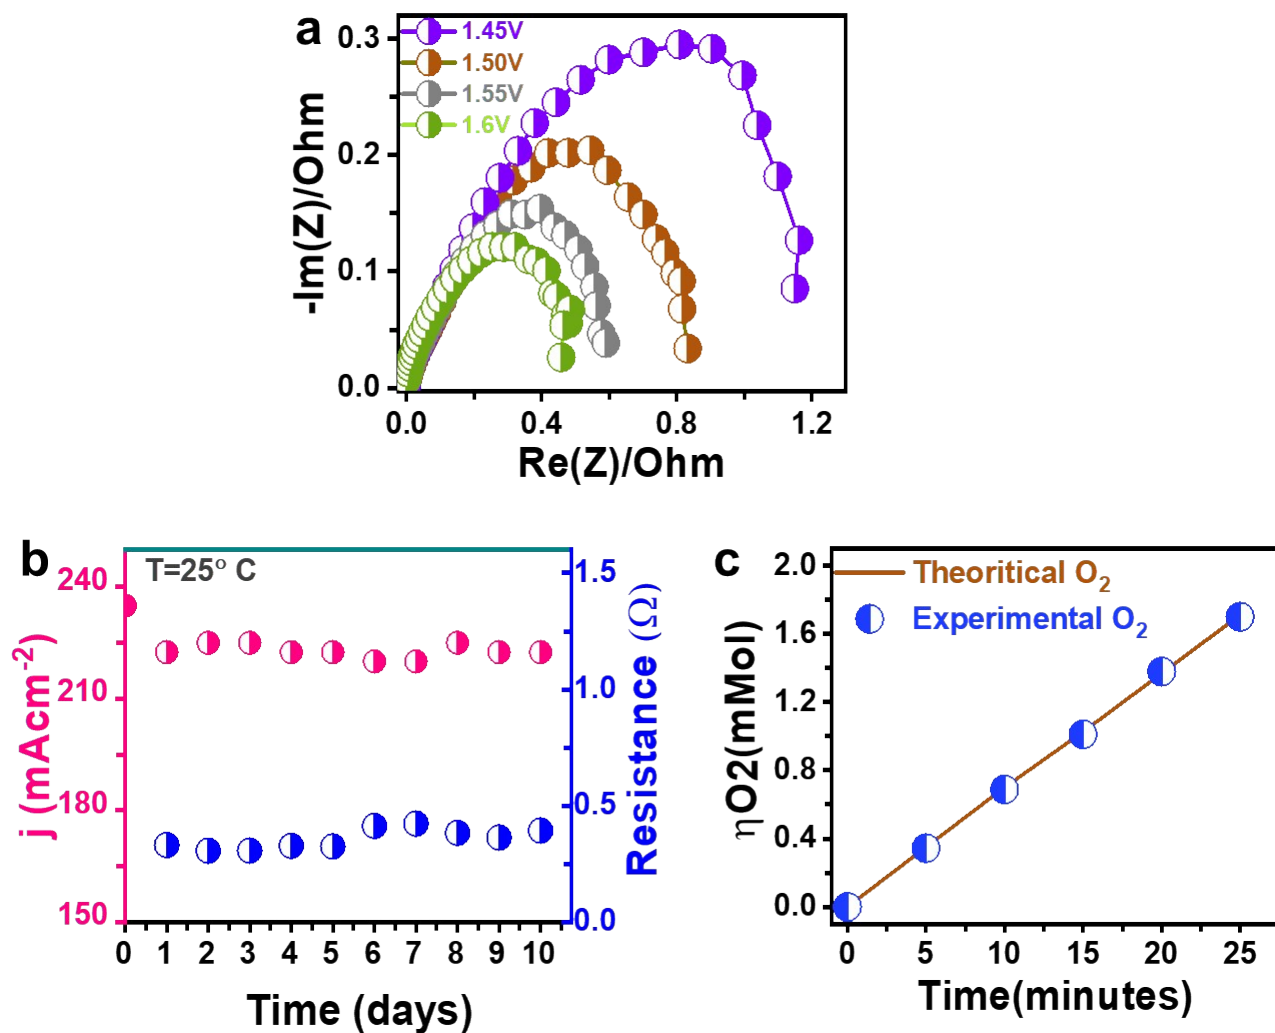

**Fig. S10** Electrochemical characterization of NiFe-BTC-GNPs based AAEMWE **a**, Nyquist plots of AEM water electrolyser measured as a function of applied potential in the ultra-pure water. **b**, Long-term durability of the cell with pt/C cathode at constant potential 1.8 V. **c**, Faradaic efficiency measured through water displacement method.

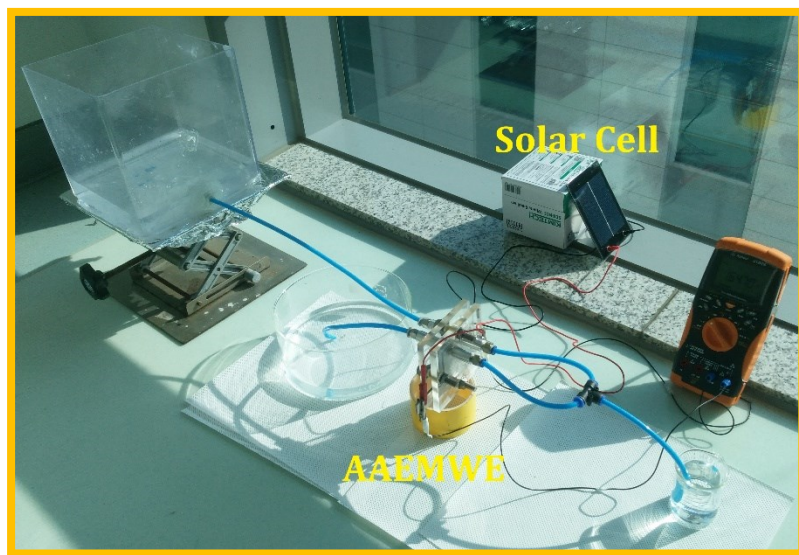

**Fig. S11** Solar-to-hydrogen (STH) conversion: Demonstration of PV-powered AAEMWE for solar hydrogen production. Experimental set up used for the Solar to Hydrogen Efficiency (STH) Measurements. The single cell comprising NiFe-BTC-GNPs MOF as anode catalyst was integrated with commercial silicon solar cell.

## Supplementary Tables

**Table S1.** Summary of the OER performance of our catalysts compared with high performance catalysts reported in the literature.

| Catalysts                                            | Electrolyte | $\eta_{O_2}$ @ $j=10$<br>$mA\ cm^{-2}$<br>(mV) | Stability<br>(hrs) | Reference |
|------------------------------------------------------|-------------|------------------------------------------------|--------------------|-----------|
| NiFe-BTC-GNPs<br>MOF/CFP                             | 1M KOH      | 220                                            | 1000*              | This work |
| NiFe-BTC-GNPs<br>MOF/NF                              | 1M KOH      | 180<br>(j=20)                                  |                    | This Work |
| NiFeLDH/NF                                           | 1M KOH      | 250                                            | 96                 | This work |
| IrO <sub>2</sub> /CFP                                | 1M KOH      | 280                                            | 32                 | This Work |
| Ultrathin Nico-<br>MOF/NF                            | 1M KOH      | 189                                            | 11                 | 13        |
| Ultrathin NiFe-<br>MOF/NF                            | 1M KOH      | 240                                            | 5.5                | 14        |
| Fe1Ni2-<br>BDC MOF/GCE                               | 1M KOH      | 260                                            | 10                 | 3         |
| Co0.6Fe0.4-MOF-<br>74/GCE                            | 1M KOH      | 280                                            | 12                 | 15        |
| NaNi <sub>0.8</sub> Fe <sub>0.2</sub> O <sub>2</sub> | 1M KOH      | 320                                            | 30                 | 16        |
| O <sub>2</sub> -Cat-1/Fe Plate                       | 1M KOH      | 269                                            | 100                | 17        |
| NiFe hydroxide/<br>Nickel Foam                       | 1M KOH      | 245                                            | 10                 | 18        |
| NiFe LDH/Nickel<br>Foam                              | 1M KOH      | 240                                            | 10                 | 19        |
| Ni-Co-P Hollow<br>Nano bricks                        | 1M KOH      | 270                                            | 20                 | 20        |
| cobalt-vanadium<br>hydr(oxy)oxide                    | 1M KOH      | 250                                            | 170                | 21        |
| Ni <sub>0.75</sub> V <sub>0.25</sub> -LDH            | 1M KOH      | 320                                            | 25                 | 22        |

Some of the information was not specified in the literature and was estimated according to the data graphs.

CFP: Carbon Fiber Paper , NF: Nickel Foam

GCE : Glassy carbon electrode

\*Overall stability : cv cycles, half-cell stability and electrolyser stability

## References:

1. W. J. Li, S. Watzele, H. A. El-Sayed, Y. C. Liang, G. Kieslich, A. S. Bandarenka, K. Rodewald, B. Rieger and R. A. Fischer, *Journal of the American Chemical Society*, 2019, **141**, 5926-5933.
2. Q. Sun, M. Liu, K. Li, Y. Han, Y. Zuo, F. Chai, C. Song, G. Zhang and X. Guo, *Inorganic Chemistry Frontiers*, 2017, **4**, 144-153.
3. J. Li, W. Huang, M. Wang, S. Xi, J. Meng, K. Zhao, J. Jin, W. Xu, Z. Wang, X. Liu, Q. Chen, L. Xu, X. Liao, Y. Jiang, K. A. Owusu, B. Jiang, C. Chen, D. Fan, L. Zhou and L. Mai, *ACS Energy Letters*, 2018, **4**, 285-292.
4. O. M. Yaghi, H. Li and T. L. Groy, *Journal of the American Chemical Society*, 1996, **118**, 9096-9101.
5. L. T. L. Nguyen, T. T. Nguyen, K. D. Nguyen and N. T. S. Phan, *Applied Catalysis A: General*, 2012, **425-426**, 44-52.
6. C. E. Santolalla-Vargas, V. Santes, C. Ortega-Niño, A. Hernández-Gordillo, F. Sanchez-Minero, L. Lartundo-Rojas, R. Borja-Urby, J. C. López-Curiel, O. Goiz and I. I. Padilla-Martinez, *Catalysis Today*, 2018, DOI: 10.1016/j.cattod.2018.02.010.
7. Y. Kim, K. Cho, K. Lee, J. Choo, M.-s. Gong and S.-W. Joo, *Journal of Molecular Structure*, 2008, **878**, 155-161.
8. C. Prestipino, L. Regli, J. G. Vitillo, F. Bonino, A. Damin, C. Lamberti, A. Zecchina, P. L. Solari, K. O. Kongshaug and S. Bordiga, *Chemistry of Materials*, 2006, **18**, 1337-1346.
9. L. Cai, J. Zhao, H. Li, J. Park, I. S. Cho, H. S. Han and X. Zheng, *ACS Energy Letters*, 2016, **1**, 624-632.
10. M. W. Louie and A. T. Bell, *Journal of the American Chemical Society*, 2013, **135**, 12329-12337.
11. J. B. Wu, M. L. Lin, X. Cong, H. N. Liu and P. H. Tan, *Chem Soc Rev*, 2018, **47**, 1822-1873.
12. M. Jahan, Q. Bao and K. P. Loh, *Journal of the American Chemical Society*, 2012, **134**, 6707-6713.
13. S. Zhao, Y. Wang, J. Dong, C.-T. He, H. Yin, P. An, K. Zhao, X. Zhang, C. Gao, L. Zhang, J. Lv, J. Wang, J. Zhang, A. M. Khattak, N. A. Khan, Z. Wei, J. Zhang, S. Liu, H. Zhao and Z. Tang, *Nature Energy*, 2016, **1**.
14. J. Duan, S. Chen and C. Zhao, *Nature Communications*, 2017, **8**, 15341.

15. X. Zhao, B. Pattengale, D. Fan, Z. Zou, Y. Zhao, J. Du, J. Huang and C. Xu, *ACS Energy Letters*, 2018, **3**, 2520-2526.
16. B. Weng, F. Xu, C. Wang, W. Meng, C. R. Grice and Y. Yan, *Energy & Environmental Science*, 2017, **10**, 121-128.
17. Y. Liu, X. Liang, L. Gu, Y. Zhang, G. D. Li, X. Zou and J. S. Chen, *Nature Communications*, 2018, **9**, 2609.
18. X. Lu and C. Zhao, *Nature Communications*, 2015, **6**, 6616.
19. J. Luo, J.-H. Im, M. T. Mayer, M. Schreier, M. K. Nazeeruddin, N.-G. Park, S. D. Tilley, H. J. Fan and M. Grätzel, *Science*, 2014, **345**, 1593.
20. E. Hu, Y. Feng, J. Nai, D. Zhao, Y. Hu and X. W. Lou, *Energy & Environmental Science*, 2018, **11**, 872-880.
21. J. Liu, Y. Ji, J. Nai, X. Niu, Y. Luo, L. Guo and S. Yang, *Energy & Environmental Science*, 2018, **11**, 1736-1741.
22. K. Fan, H. Chen, Y. Ji, H. Huang, P. M. Claesson, Q. Daniel, B. Philippe, H. Rensmo, F. Li, Y. Luo and L. Sun, *Nature Communications*, 2016, **7**, 11981.
